# Supplementary material for: Persistence of Antibiotic-Resistant Escherichia coli Strains Belonging to the B2 Phylogroup in Municipal Wastewater under Aerobic Conditions
Source: MDPI journal article supplement (doi:10.3390/antibiotics11020202), 2022-02-04
Supplement: s1 [file s1]

## Supplementary Materials

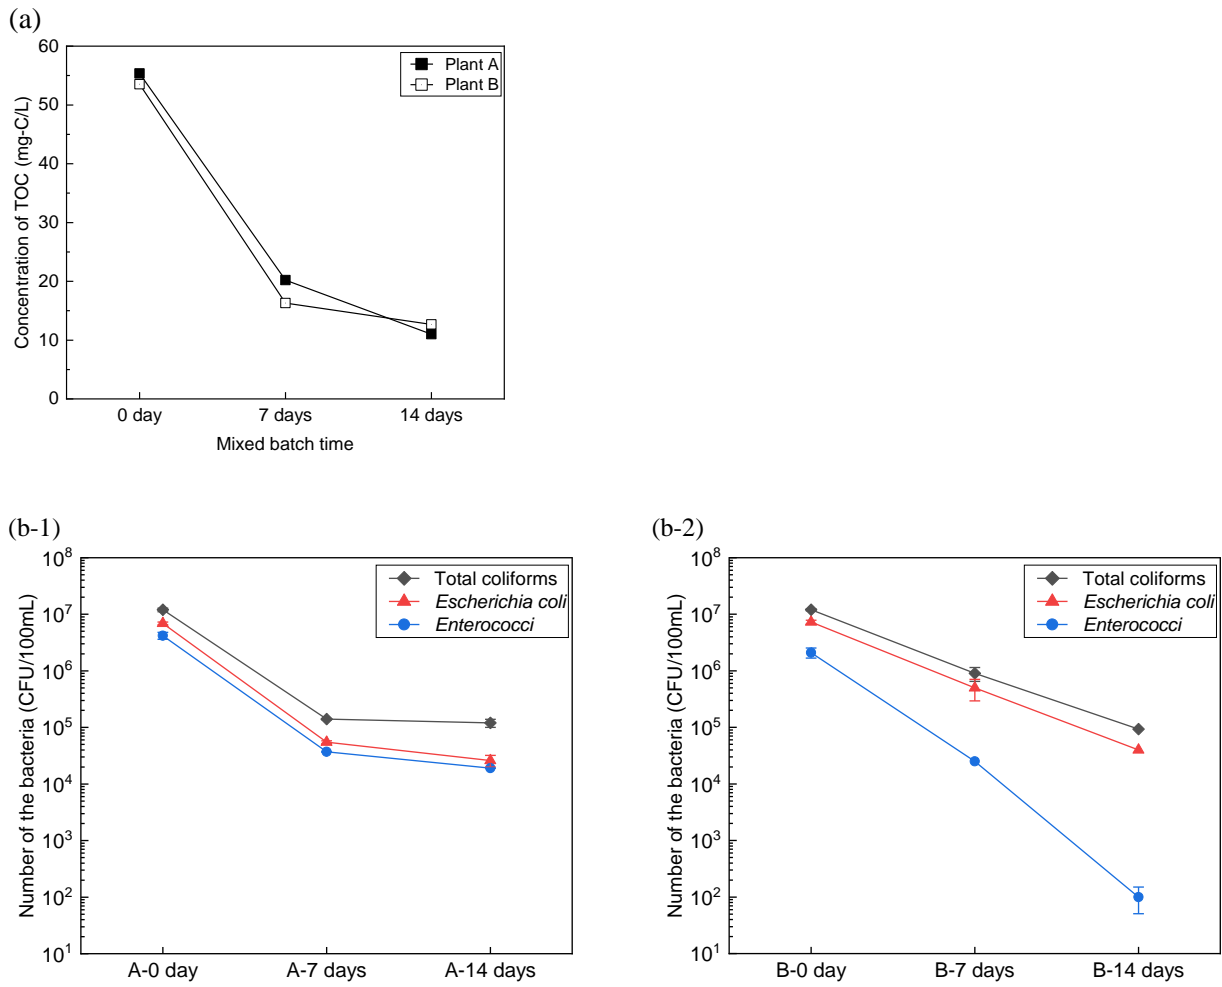

**Figure S1.** Changes to TOC concentrations and number of bacteria in wastewater samples collected from plants A and B. TOC concentration under aerobic conditions for 14 days (a). Abundances of bacteria in wastewater samples collected from plants A (b-1) and B (b-2).

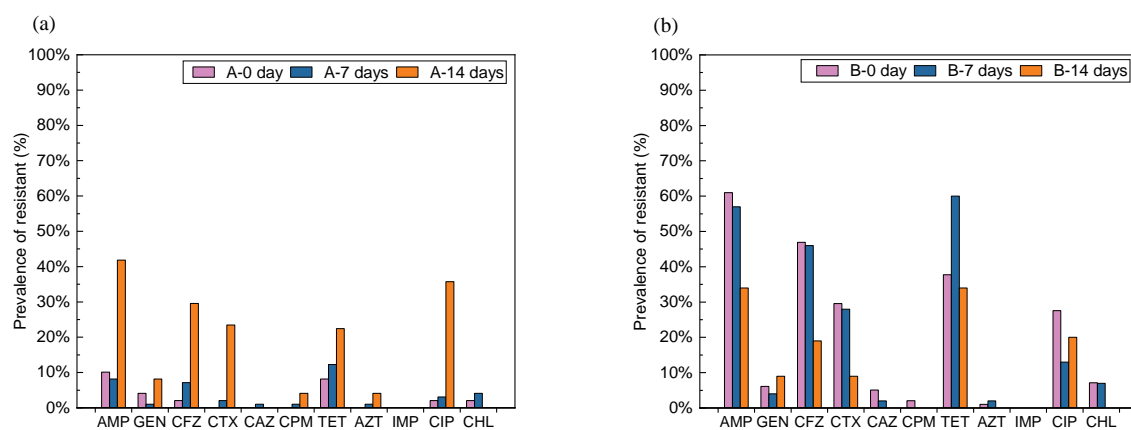

**Figure S2:** Resistance of *E. coli* isolates in wastewater samples collected from plants A and B to the 11 tested antibiotics. Abbreviations: AMP, ampicillin; GEN, gentamicin; CFZ, cefazolin; CTX, ceftazidime; CAZ, cefotaxime; TET, tetracycline; AZT, Aztreonam; IMP, imipenem; CIP, ciprofloxacin; CPM, Cefepime; CHL, chloramphenicol.

**Table S1:** Design of primers sequence for detection of phylogroups of *E. coli* isolates.

| Primer name | Target      | Primer sequences              | PCR product (bp) |
|-------------|-------------|-------------------------------|------------------|
| chuA.1b     | <i>chuA</i> | F: 5'-ATGGTACCGGACGAACCAAC-3' | 288              |
| chuA.2      |             | R: 5'-TGCCGCCAGTACCAAAGACA-3' |                  |
| yjaA.1b     | <i>yjaA</i> | F: 5'-CAAACGTGAAGTGTCAGGAG-3' | 211              |
| yjaA.2b     |             | R: 5'-AATGCGTTCCTCAACCTGTG-3' |                  |
| TspE4C2.1b  | TspE4.C2    | F: 5'-CACTATTCGTAAGGTCATCC-3' | 152              |
| TspE4C2.2b  |             | R: 5'-AGTTTATCGCTGCGGGTCGC-3' |                  |
| AceK.f      | <i>arpA</i> | F: 5'-AACGCTATTCGCCAGCTTGC-3' | 400              |
| ArpA1.r     |             | R: 5'-TCTCCCCATACCGTACGCTA-3' |                  |

**Table S2:** Design of primers sequence for detection of ESBL-producing genotypes of *E. coli* isolates.

| bate-Lactamase(s) genotypes | Primer sequences                                                 | PCR product (bp) |
|-----------------------------|------------------------------------------------------------------|------------------|
| TEM-type                    | F: 5'-CCGTGTCGCCCTTATTCC-3'<br>R: 5'-AGGCACCTATCTCAGCGA-3'       | 824              |
| SHV-type                    | F: 5'-ATTTGTCGCTTCTTTACTCGC-3'<br>R: 5'-TTTATGGCGTTACCTTTGACC-3' | 1051             |
| CTX-M-1-type                | F: 5'-GCTGTTGTTAGGAAGTGTGC-3'<br>R: 5'- CCATTGCCCCGAGGTGAAG-3'   | 516              |
| CTX-M-2-type                | F: 5'-ACGCTACCCCTGCTATTT-3'<br>R: 5'- GCTTTCCGCCTTCTGCTC-3'      | 779 or 780       |
| CTX-M-9-type                | F: 5'- GCAGATAATACGCAGGTG-3'<br>R: 5'-CGGCGTGGTGGTGTCTCT-3'      | 393              |

**Table S3:** The parameters of water quality and the number of bacteria in each sample from plant A and B.

| Sample  | Mixed batch time | pH<br>(-) | EC<br>( $\mu\text{s}/\text{cm}$ ) | Turbidity<br>(ppm) | TOC<br>( $\text{mg}\cdot\text{C}/\text{L}$ ) | Bacteria (CFU/100 mL) |                         |                  |
|---------|------------------|-----------|-----------------------------------|--------------------|----------------------------------------------|-----------------------|-------------------------|------------------|
|         |                  |           |                                   |                    |                                              | Total coliforms       | <i>Escherichia coli</i> | Enterococci      |
| Plant A | 0 day            | 8.036     | 0.487                             | 102.40             | 55.36                                        | $1.2\times 10^7$      | $6.9\times 10^6$        | $4.2\times 10^6$ |
|         | 7 days           | 6.649     | 0.589                             | 74.14              | 20.21                                        | $1.4\times 10^5$      | $5.5\times 10^4$        | $3.7\times 10^4$ |
|         | 14 days          | 5.483     | 0.480                             | 59.10              | 10.99                                        | $1.2\times 10^5$      | $2.6\times 10^4$        | $1.9\times 10^4$ |
| Plant B | 0 day            | 7.286     | 1.640                             | 144.76             | 53.50                                        | $1.2\times 10^7$      | $7.3\times 10^6$        | $2.1\times 10^6$ |
|         | 7 days           | 6.891     | 1.723                             | 50.60              | 16.29                                        | $9.0\times 10^5$      | $5.0\times 10^5$        | $2.5\times 10^4$ |
|         | 14 days          | 5.752     | 1.675                             | 60.30              | 12.66                                        | $4.0\times 10^4$      | $9.3\times 10^4$        | $1.0\times 10^2$ |

EC, Electrical conductivity; TOC, Total Organic Carbon; N, no data

Abbreviations: AMP, ampicillin; GEN, gentamicin; CFZ, cefazolin; CTX, ceftazidime; CAZ, cefotaxime; TET, tetracycline; AZT, Aztreonam; IMP, imipenem; CIP, ciprofloxacin; CPM, Cefepime; CHL, chloramphenicol.

| Strain | AMP | GEN | CEZ | CTX | CAZ | TET | IMP | CIP | CHI | CPM | AZT |
|--------|-----|-----|-----|-----|-----|-----|-----|-----|-----|-----|-----|
|--------|-----|-----|-----|-----|-----|-----|-----|-----|-----|-----|-----|

→Continued on next page

→Continued from previous page

[illegible]

| Strain code | AMP  | GEN | CFZ | CTX | CAZ | TET | IMP | CIP | CHL  | CPM | AZT  |
|-------------|------|-----|-----|-----|-----|-----|-----|-----|------|-----|------|
| B-1         | S-8  | S-4 | S-2 | S-1 | S-4 | S-4 | S-1 | S-1 | S-8  | S-8 | S-8  |
| B-2         | S-8  | S-4 | S-2 | S-1 | S-4 | S-4 | S-1 | S-1 | S-8  | S-8 | S-8  |
| B-3         | S-8  | S-4 | S-2 | S-1 | S-4 | S-4 | S-1 | S-1 | S-8  | S-8 | S-8  |
| B-4         | I-16 | S-4 | S-2 | I-2 | S-4 | S-4 | S-1 | S-1 | S-8  | S-8 | S-8  |
| B-5         | S-8  | S-4 | S-2 | S-1 | S-4 | S-4 | S-1 | S-1 | S-8  | S-8 | S-8  |
| B-6         | S-8  | S-4 | S-2 | S-1 | S-4 | S-4 | S-1 | S-1 | S-8  | S-8 | S-8  |
| B-7         | S-8  | S-4 | S-2 | S-1 | S-4 | S-4 | S-1 | S-1 | S-8  | S-8 | S-8  |
| B-8         | S-8  | S-4 | S-2 | S-1 | S-4 | S-4 | S-1 | S-1 | S-8  | S-8 | S-8  |
| B-9         | S-8  | S-4 | S-2 | S-1 | S-4 | S-4 | S-1 | S-1 | S-8  | S-8 | S-8  |
| B-10        | S-8  | S-4 | S-2 | S-1 | S-4 | S-1 | S-1 | S-1 | S-8  | S-8 | S-8  |
| B-11        | S-8  | S-4 | S-2 | S-1 | S-4 | S-1 | S-1 | S-1 | S-8  | S-8 | S-8  |
| B-12        | S-8  | S-4 | S-2 | S-1 | S-4 | S-1 | S-1 | S-1 | S-8  | S-8 | S-8  |
| B-13        | S-8  | S-4 | S-2 | S-1 | S-4 | S-1 | S-1 | S-1 | S-8  | S-8 | S-8  |
| B-14        | S-8  | S-4 | S-2 | S-1 | S-4 | S-4 | S-1 | S-1 | S-8  | S-8 | S-8  |
| B-15        | S-8  | S-4 | S-2 | S-1 | S-4 | S-1 | S-1 | S-1 | S-8  | S-8 | S-8  |
| B-16        | S-8  | S-4 | S-2 | S-1 | S-4 | S-1 | S-1 | S-1 | S-8  | S-8 | S-8  |
| B-17        | S-8  | S-4 | S-2 | S-1 | S-4 | S-1 | S-1 | S-1 | S-8  | S-8 | S-8  |
| B-18        | S-8  | S-4 | S-2 | S-1 | S-4 | S-1 | S-1 | S-1 | S-8  | S-8 | S-8  |
| B-19        | S-8  | S-4 | S-2 | S-1 | S-4 | S-1 | S-1 | S-1 | S-8  | S-8 | S-8  |
| B-20        | S-8  | S-4 | S-2 | S-1 | S-4 | S-1 | S-1 | S-1 | S-8  | S-8 | S-8  |
| B-21        | S-8  | S-4 | S-2 | S-1 | S-4 | S-1 | S-1 | S-1 | S-8  | S-8 | S-8  |
| B-22        | S-8  | S-4 | S-2 | S-1 | S-4 | S-4 | S-1 | S-1 | S-8  | S-8 | S-8  |
| B-23        | S-8  | S-4 | S-2 | S-1 | S-4 | S-1 | S-1 | S-1 | S-8  | S-8 | S-8  |
| B-24        | S-8  | S-4 | S-2 | S-1 | S-4 | S-1 | S-1 | S-1 | S-8  | S-8 | S-8  |
| B-25        | S-8  | S-4 | S-2 | S-1 | S-4 | S-4 | S-1 | S-1 | S-8  | S-8 | S-8  |
| B-26        | S-8  | S-4 | S-2 | S-1 | S-4 | S-1 | S-1 | S-1 | S-8  | S-8 | S-8  |
| B-27        | S-8  | S-4 | S-2 | S-1 | S-4 | S-4 | S-1 | S-1 | S-8  | S-8 | S-8  |
| B-28        | S-8  | S-4 | S-2 | S-1 | S-4 | S-4 | S-1 | S-1 | S-8  | S-8 | S-8  |
| B-29        | S-8  | S-4 | S-2 | S-1 | S-4 | S-4 | S-1 | S-1 | S-8  | S-8 | S-8  |
| B-30        | S-8  | S-4 | S-2 | S-1 | S-4 | S-4 | S-1 | S-1 | S-8  | S-8 | S-8  |
| B-31        | S-8  | S-4 | S-2 | S-1 | S-4 | S-4 | S-1 | S-1 | S-8  | S-8 | S-8  |
| B-32        | S-8  | S-4 | S-2 | S-1 | S-4 | S-4 | S-1 | S-1 | S-8  | S-8 | S-8  |
| B-33        | S-8  | S-4 | S-2 | S-1 | I-8 | S-4 | S-1 | S-1 | S-8  | S-8 | S-8  |
| B-34        | S-8  | S-4 | S-2 | S-1 | I-8 | S-4 | S-1 | S-1 | S-8  | S-8 | S-8  |
| B-35        | S-8  | S-4 | S-2 | S-1 | I-8 | S-4 | S-1 | S-1 | S-8  | S-8 | S-8  |
| B-36        | S-8  | S-4 | S-2 | S-1 | S-4 | S-4 | S-1 | S-1 | S-8  | S-8 | S-8  |
| B-37        | S-8  | S-4 | S-2 | S-1 | S-4 | S-4 | S-1 | S-1 | S-8  | S-8 | S-8  |
| B-38        | S-8  | S-4 | S-2 | I-2 | S-4 | S-4 | S-1 | S-1 | S-8  | S-8 | S-8  |
| B-39        | S-8  | S-4 | S-2 | S-1 | S-4 | S-4 | S-1 | S-1 | S-8  | S-8 | S-8  |
| B-40        | S-8  | S-4 | S-2 | S-1 | S-4 | S-4 | S-1 | S-1 | S-8  | S-8 | S-8  |
| B-41        | S-8  | S-4 | S-2 | S-1 | S-4 | S-4 | S-1 | S-1 | S-8  | S-8 | S-8  |
| B-42        | I-16 | S-4 | S-2 | S-1 | S-4 | S-4 | S-1 | S-1 | S-8  | S-8 | S-8  |
| B-43        | S-8  | S-4 | S-2 | S-1 | S-4 | S-4 | S-1 | S-1 | S-8  | S-8 | S-8  |
| B-44        | I-16 | S-4 | S-2 | S-1 | S-4 | S-4 | S-1 | S-1 | S-8  | S-8 | S-8  |
| B-45        | S-8  | S-4 | S-2 | S-1 | S-4 | S-4 | S-1 | S-1 | S-8  | S-8 | S-8  |
| B-46        | S-8  | S-4 | S-2 | S-1 | S-4 | S-4 | S-1 | S-1 | S-8  | S-8 | S-8  |
| B-47        | S-8  | S-4 | S-2 | S-1 | S-4 | S-4 | S-1 | S-1 | S-8  | S-8 | S-8  |
| B-48        | S-8  | S-4 | S-2 | S-1 | S-4 | S-4 | S-1 | S-1 | S-8  | S-8 | S-8  |
| B-49        | S-8  | S-4 | S-2 | S-1 | S-4 | S-4 | S-1 | S-1 | S-8  | S-8 | S-8  |
| B-50        | S-8  | S-4 | S-2 | S-1 | S-4 | S-4 | S-1 | S-1 | S-8  | S-8 | I-16 |
| B-51        | S-8  | S-4 | S-2 | S-1 | I-8 | S-4 | S-1 | S-1 | S-8  | S-8 | I-16 |
| B-52        | S-8  | S-4 | S-2 | S-1 | S-4 | S-4 | S-1 | S-1 | S-8  | S-8 | S-8  |
| B-53        | S-8  | S-4 | S-2 | S-1 | S-4 | S-4 | S-1 | S-1 | S-8  | S-8 | S-8  |
| B-54        | S-8  | S-4 | S-2 | S-1 | S-4 | S-4 | S-1 | S-1 | S-8  | S-8 | S-8  |
| B-55        | S-8  | S-4 | S-2 | S-1 | S-4 | S-4 | S-1 | S-1 | S-8  | S-8 | S-8  |
| B-56        | S-8  | S-4 | S-2 | S-1 | S-4 | S-4 | S-1 | S-1 | S-8  | S-8 | S-8  |
| B-57        | S-8  | S-4 | S-2 | S-1 | S-4 | S-4 | S-1 | S-1 | S-8  | S-8 | S-8  |
| B-58        | S-8  | S-4 | S-2 | S-1 | S-4 | S-4 | S-1 | S-1 | S-8  | S-8 | S-8  |
| B-59        | S-8  | S-4 | S-2 | S-1 | S-4 | S-4 | S-1 | S-1 | S-8  | S-8 | S-8  |
| B-60        | S-8  | S-4 | S-2 | S-1 | S-4 | S-4 | S-1 | S-1 | S-8  | S-8 | S-8  |
| B-61        | S-8  | S-4 | S-2 | S-1 | S-4 | S-4 | S-1 | S-1 | S-8  | S-8 | S-8  |
| B-62        | S-8  | S-4 | S-2 | S-1 | S-4 | S-4 | S-1 | S-1 | S-8  | S-8 | S-8  |
| B-63        | S-8  | S-4 | I-4 | S-1 | S-4 | S-4 | S-1 | S-1 | S-8  | S-8 | S-8  |
| B-64        | S-8  | S-4 | S-2 | S-1 | S-4 | S-4 | S-1 | S-1 | S-8  | S-8 | S-8  |
| B-65        | I-16 | S-4 | S-2 | S-1 | S-4 | S-4 | S-1 | S-1 | S-8  | S-8 | S-8  |
| B-66        | S-8  | S-4 | S-2 | S-1 | S-4 | S-4 | S-1 | S-1 | S-8  | S-8 | S-8  |
| B-67        | S-8  | S-4 | S-2 | S-1 | S-4 | S-4 | S-1 | S-1 | S-8  | S-8 | S-8  |
| B-68        | S-8  | S-4 | S-2 | S-1 | S-4 | S-4 | S-1 | S-1 | S-8  | S-8 | I-16 |
| B-69        | S-8  | S-4 | S-2 | S-1 | S-4 | S-4 | S-1 | S-1 | S-8  | S-8 | S-8  |
| B-70        | S-8  | S-4 | S-2 | S-1 | S-4 | S-4 | S-1 | S-1 | S-8  | S-8 | S-8  |
| B-71        | S-8  | S-4 | S-2 | S-1 | S-4 | S-4 | S-1 | S-1 | S-8  | S-8 | S-8  |
| B-72        | I-16 | S-4 | S-2 | S-1 | S-4 | S-4 | S-1 | S-1 | S-8  | S-8 | S-8  |
| B-73        | S-8  | S-4 | S-2 | S-1 | S-4 | S-4 | S-1 | S-1 | S-8  | S-8 | S-8  |
| B-74        | S-8  | S-4 | S-2 | S-1 | S-4 | S-4 | S-1 | S-1 | S-8  | S-8 | S-8  |
| B-75        | S-8  | S-4 | S-2 | S-1 | S-4 | S-4 | S-1 | S-1 | S-8  | S-8 | S-8  |
| B-76        | S-8  | S-4 | S-2 | S-1 | S-4 | S-4 | S-1 | S-1 | S-8  | S-8 | S-8  |
| B-77        | S-8  | S-4 | S-2 | S-1 | S-4 | S-4 | S-1 | S-1 | S-8  | S-8 | S-8  |
| B-78        | S-8  | S-4 | S-2 | S-1 | S-4 | S-4 | S-1 | S-1 | S-8  | S-8 | S-8  |
| B-79        | S-8  | S-4 | S-2 | S-1 | S-4 | S-4 | S-1 | S-1 | S-8  | S-8 | S-8  |
| B-80        | S-8  | S-4 | S-2 | S-1 | S-4 | S-4 | S-1 | S-1 | S-8  | S-8 | S-8  |
| B-81        | S-8  | S-4 | S-2 | S-1 | S-4 | S-4 | S-1 | S-1 | S-8  | S-8 | S-8  |
| B-82        | S-8  | S-4 | S-2 | S-1 | S-4 | S-4 | S-1 | S-1 | S-8  | S-8 | S-8  |
| B-83        | S-8  | S-4 | S-2 | S-1 | S-4 | S-4 | S-1 | S-1 | S-8  | S-8 | S-8  |
| B-84        | S-8  | S-4 | S-2 | S-1 | S-4 | S-4 | S-1 | S-1 | S-8  | S-8 | S-8  |
| B-85        | S-8  | S-4 | S-2 | S-1 | S-4 | S-4 | S-1 | S-1 | S-8  | S-8 | S-8  |
| B-86        | S-8  | S-4 | S-2 | S-1 | S-4 | S-4 | S-1 | S-1 | S-8  | S-8 | S-8  |
| B-87        | S-8  | S-4 | S-2 | S-1 | S-4 | S-4 | S-1 | S-1 | S-8  | S-8 | S-8  |
| B-88        | S-8  | S-4 | S-2 | S-1 | S-4 | S-4 | S-1 | S-1 | S-8  | S-8 | S-8  |
| B-89        | S-8  | S-4 | S-2 | S-1 | S-4 | S-4 | S-1 | S-1 | S-8  | S-8 | S-8  |
| B-90        | S-8  | S-4 | S-2 | S-1 | S-4 | S-4 | S-1 | S-1 | S-8  | S-8 | S-8  |
| B-91        | S-8  | S-4 | S-2 | S-1 | S-4 | S-4 | S-1 | S-1 | S-8  | S-8 | S-8  |
| B-92        | S-8  | S-4 | S-2 | S-1 | S-4 | S-4 | S-1 | S-1 | S-8  | S-8 | S-8  |
| B-93        | S-8  | S-4 | S-2 | S-1 | S-4 | S-4 | S-1 | S-1 | I-16 | S-8 | S-8  |
| B-94        | S-8  | S-4 | S-2 | S-1 | S-4 | S-4 | S-1 | S-1 | S-8  | S-8 | S-8  |
| B-95        | S-8  | S-4 | I-4 | S-1 | S-4 | S-4 | S-1 | S-1 | S-8  | S-8 | S-8  |
| B-96        | S-8  | S-4 | S-2 | S-1 | S-4 | S-4 | S-1 | S-1 | S-8  | S-8 | S-8  |
| B-97        | S-8  | S-4 | S-2 | S-1 | S-4 | S-4 | S-1 | S-1 | S-8  | S-8 | S-8  |
| B-98        | S-8  | S-4 | S-2 | S-1 | S-4 | S-4 | S-1 | S-1 | S-8  | S-8 | S-8  |
| B-99        | S-8  | S-4 | S-2 | S-1 | S-4 | S-4 | S-1 | S-1 | S-8  | S-8 | S-8  |
| B-100       | S-8  | S-4 | S-2 | S-1 | S-4 | S-4 | S-1 | S-1 | S-8  | S-8 | S-8  |

| Strain | AMP            | GEN            | CFZ            | CTX            | CAZ            | TET            | IMP            | CIP            | CHL            | CPM            | AZI            |
|--------|----------------|----------------|----------------|----------------|----------------|----------------|----------------|----------------|----------------|----------------|----------------|
| B-141  | S <sub>8</sub> | S <sub>4</sub> | S <sub>2</sub> | S <sub>1</sub> | S <sub>4</sub> | S <sub>4</sub> | S <sub>1</sub> | S <sub>1</sub> | S <sub>8</sub> | S <sub>8</sub> | S <sub>8</sub> |
| B-142  | S <sub>8</sub> | S <sub>4</sub> | S <sub>2</sub> | S <sub>1</sub> | S <sub>4</sub> | S <sub>4</sub> | S <sub>1</sub> | S <sub>1</sub> | S <sub>8</sub> | S <sub>8</sub> | S <sub>8</sub> |
| B-143  | S <sub>8</sub> | S <sub>4</sub> | S <sub>2</sub> | S <sub>1</sub> | S <sub>4</sub> | S <sub>4</sub> | S <sub>1</sub> | S <sub>1</sub> | S <sub>8</sub> | S <sub>8</sub> | S <sub>8</sub> |
| B-144  | S <sub>8</sub> | S <sub>4</sub> | S <sub>2</sub> | S <sub>1</sub> | S <sub>4</sub> | S <sub>4</sub> | S <sub>1</sub> | S <sub>1</sub> | S <sub>8</sub> | S <sub>8</sub> | S <sub>8</sub> |
| B-145  | S <sub>8</sub> | S <sub>4</sub> | S <sub>2</sub> | S <sub>1</sub> | S <sub>4</sub> | S <sub>4</sub> | S <sub>1</sub> | S <sub>1</sub> | S <sub>8</sub> | S <sub>8</sub> | S <sub>8</sub> |
| B-146  | S <sub>8</sub> | S <sub>4</sub> | S <sub>2</sub> | S <sub>1</sub> | S <sub>4</sub> | S <sub>4</sub> | S <sub>1</sub> | S <sub>1</sub> | S <sub>8</sub> | S <sub>8</sub> | S <sub>8</sub> |
| B-147  | S <sub>8</sub> | S <sub>4</sub> | S <sub>2</sub> | S <sub>1</sub> | S <sub>4</sub> | S <sub>4</sub> | S <sub>1</sub> | S <sub>1</sub> | S <sub>8</sub> | S <sub>8</sub> | S <sub>8</sub> |
| B-148  | S <sub>8</sub> | S <sub>4</sub> | S <sub>2</sub> | S <sub>1</sub> | S <sub>4</sub> | S <sub>4</sub> | S <sub>1</sub> | S <sub>1</sub> | S <sub>8</sub> | S <sub>8</sub> | S <sub>8</sub> |
| B-149  | S <sub>8</sub> | S <sub>4</sub> | S <sub>2</sub> | S <sub>1</sub> | S <sub>4</sub> | S <sub>4</sub> | S <sub>1</sub> | S <sub>1</sub> | S <sub>8</sub> | S <sub>8</sub> | S <sub>8</sub> |
| B-140  | S <sub>8</sub> | S <sub>4</sub> | S <sub>2</sub> | S <sub>1</sub> | S <sub>4</sub> | S <sub>4</sub> | S <sub>1</sub> | S <sub>1</sub> | S <sub>8</sub> | S <sub>8</sub> | S <sub>8</sub> |
| B-1411 | S <sub>8</sub> | S <sub>4</sub> | S <sub>2</sub> | S <sub>1</sub> | S <sub>4</sub> | S <sub>4</sub> | S <sub>1</sub> | S <sub>1</sub> | S <sub>8</sub> | S <sub>8</sub> | S <sub>8</sub> |
| B-1412 | S <sub>8</sub> | S <sub>4</sub> | S <sub>2</sub> | S <sub>1</sub> | S <sub>4</sub> | S <sub>4</sub> | S <sub>1</sub> | S <sub>1</sub> | S <sub>8</sub> | S <sub>8</sub> | S <sub>8</sub> |
| B-1413 | S <sub>8</sub> | S <sub>4</sub> | S <sub>2</sub> | S <sub>1</sub> | S <sub>4</sub> | S <sub>4</sub> | S <sub>1</sub> | S <sub>1</sub> | S <sub>8</sub> | S <sub>8</sub> | S <sub>8</sub> |
| B-1414 | S <sub>8</sub> | S <sub>4</sub> | S <sub>2</sub> | S <sub>1</sub> | S <sub>4</sub> | S <sub>4</sub> | S <sub>1</sub> | S <sub>1</sub> | S <sub>8</sub> | S <sub>8</sub> | S <sub>8</sub> |
| B-1415 | S <sub>8</sub> | S <sub>4</sub> | S <sub>2</sub> | S <sub>1</sub> | S <sub>4</sub> | S <sub>4</sub> | S <sub>1</sub> | S <sub>1</sub> | S <sub>8</sub> | S <sub>8</sub> | S <sub>8</sub> |
| B-1416 | S <sub>8</sub> | S <sub>4</sub> | S <sub>2</sub> | S <sub>1</sub> | S <sub>4</sub> | S <sub>4</sub> | S <sub>1</sub> | S <sub>1</sub> | S <sub>8</sub> | S <sub>8</sub> | S <sub>8</sub> |
| B-1417 | S <sub>8</sub> | S <sub>4</sub> | S <sub>2</sub> | S <sub>1</sub> | S <sub>4</sub> | S <sub>4</sub> | S <sub>1</sub> | S <sub>1</sub> | S <sub>8</sub> | S <sub>8</sub> | S <sub>8</sub> |
| B-1418 | S <sub>8</sub> | S <sub>4</sub> | S <sub>2</sub> | S <sub>1</sub> | S <sub>4</sub> | S <sub>4</sub> | S <sub>1</sub> | S <sub>1</sub> | S <sub>8</sub> | S <sub>8</sub> | S <sub>8</sub> |
| B-1419 | S <sub>8</sub> | S <sub>4</sub> | S <sub>2</sub> | S <sub>1</sub> | S <sub>4</sub> | S <sub>4</sub> | S <sub>1</sub> | S <sub>1</sub> | S <sub>8</sub> | S <sub>8</sub> | S <sub>8</sub> |
| B-1420 | S <sub>8</sub> | S <sub>4</sub> | S <sub>2</sub> | S <sub>1</sub> | S <sub>4</sub> | S <sub>4</sub> | S <sub>1</sub> | S <sub>1</sub> | S <sub>8</sub> | S <sub>8</sub> | S <sub>8</sub> |
| B-1421 | S <sub>8</sub> | S <sub>4</sub> | S <sub>2</sub> | S <sub>1</sub> | S <sub>4</sub> | S <sub>4</sub> | S <sub>1</sub> | S <sub>1</sub> | S <sub>8</sub> | S <sub>8</sub> | S <sub>8</sub> |
| B-1422 | S <sub>8</sub> | S <sub>4</sub> | S <sub>2</sub> | S <sub>1</sub> | S <sub>4</sub> | S <sub>4</sub> | S <sub>1</sub> | S <sub>1</sub> | S <sub>8</sub> | S <sub>8</sub> | S <sub>8</sub> |
| B-1423 | S <sub>8</sub> | S <sub>4</sub> | S <sub>2</sub> | S <sub>1</sub> | S <sub>4</sub> | S <sub>4</sub> | S <sub>1</sub> | S <sub>1</sub> | S <sub>8</sub> | S <sub>8</sub> | S <sub>8</sub> |
| B-1424 | S <sub>8</sub> | S <sub>4</sub> | S <sub>2</sub> | S <sub>1</sub> | S <sub>4</sub> | S <sub>4</sub> | S <sub>1</sub> | S <sub>1</sub> | S <sub>8</sub> | S <sub>8</sub> | S <sub>8</sub> |
| B-1425 | S <sub>8</sub> | S <sub>4</sub> | S <sub>2</sub> | S <sub>1</sub> | S <sub>4</sub> | S <sub>4</sub> | S <sub>1</sub> | S <sub>1</sub> | S <sub>8</sub> | S <sub>8</sub> | S <sub>8</sub> |
| B-1426 | S <sub>8</sub> | S <sub>4</sub> | S <sub>2</sub> | S <sub>1</sub> | S <sub>4</sub> | S <sub>4</sub> | S <sub>1</sub> | S <sub>1</sub> | S <sub>8</sub> | S <sub>8</sub> | S <sub>8</sub> |
| B-1427 | S <sub>8</sub> | S <sub>4</sub> | S <sub>2</sub> | S <sub>1</sub> | S <sub>4</sub> | S <sub>4</sub> | S <sub>1</sub> | S <sub>1</sub> | S <sub>8</sub> | S <sub>8</sub> | S <sub>8</sub> |
| B-1428 | S <sub>8</sub> | S <sub>4</sub> | S <sub>2</sub> | S <sub>1</sub> | S <sub>4</sub> | S <sub>4</sub> | S <sub>1</sub> | S <sub>1</sub> | S <sub>8</sub> | S <sub>8</sub> | S <sub>8</sub> |
| B-1429 | S <sub>8</sub> | S <sub>4</sub> | S <sub>2</sub> | S <sub>1</sub> | S <sub>4</sub> | S <sub>4</sub> | S <sub>1</sub> | S <sub>1</sub> | S <sub>8</sub> | S <sub>8</sub> | S <sub>8</sub> |
| B-1430 | S <sub>8</sub> | S <sub>4</sub> | S <sub>2</sub> | S <sub>1</sub> | S <sub>4</sub> | S <sub>4</sub> | S <sub>1</sub> | S <sub>1</sub> | S <sub>8</sub> | S <sub>8</sub> | S <sub>8</sub> |
| B-1431 | S <sub>8</sub> | S <sub>4</sub> | S <sub>2</sub> | S <sub>1</sub> | S <sub>4</sub> | S <sub>4</sub> | S <sub>1</sub> | S <sub>1</sub> | S <sub>8</sub> | S <sub>8</sub> | S <sub>8</sub> |
| B-1432 | S <sub>8</sub> | S <sub>4</sub> | S <sub>2</sub> | S <sub>1</sub> | S <sub>4</sub> | S <sub>4</sub> | S <sub>1</sub> | S <sub>1</sub> | S <sub>8</sub> | S <sub>8</sub> | S <sub>8</sub> |
| B-1433 | S <sub>8</sub> | S <sub>4</sub> | S <sub>2</sub> | S <sub>1</sub> | S <sub>4</sub> | S <sub>4</sub> | S <sub>1</sub> | S <sub>1</sub> | S <sub>8</sub> | S <sub>8</sub> | S <sub>8</sub> |
| B-1434 | S <sub>8</sub> | S <sub>4</sub> | S <sub>2</sub> | S <sub>1</sub> | S <sub>4</sub> | S <sub>4</sub> | S <sub>1</sub> | S <sub>1</sub> | S <sub>8</sub> | S <sub>8</sub> | S <sub>8</sub> |
| B-1435 | S <sub>8</sub> | S <sub>4</sub> | S <sub>2</sub> | S <sub>1</sub> | S <sub>4</sub> | S <sub>4</sub> | S <sub>1</sub> | S <sub>1</sub> | S <sub>8</sub> | S <sub>8</sub> | S <sub>8</sub> |
| B-1436 | S <sub>8</sub> | S <sub>4</sub> | S <sub>2</sub> | S <sub>1</sub> | S <sub>4</sub> | S <sub>4</sub> | S <sub>1</sub> | S <sub>1</sub> | S <sub>8</sub> | S <sub>8</sub> | S <sub>8</sub> |
| B-1437 | S <sub>8</sub> | S <sub>4</sub> | S <sub>2</sub> | S <sub>1</sub> | S <sub>4</sub> | S <sub>4</sub> | S <sub>1</sub> | S <sub>1</sub> | S <sub>8</sub> | S <sub>8</sub> | S <sub>8</sub> |
| B-1438 | S <sub>8</sub> | S <sub>4</sub> | S <sub>2</sub> | S <sub>1</sub> | S <sub>4</sub> | S <sub>4</sub> | S <sub>1</sub> | S <sub>1</sub> | S <sub>8</sub> | S <sub>8</sub> | S <sub>8</sub> |
| B-1439 | S <sub>8</sub> | S <sub>4</sub> | S <sub>2</sub> | S <sub>1</sub> | S <sub>4</sub> | S <sub>4</sub> | S <sub>1</sub> | S <sub>1</sub> | S <sub>8</sub> | S <sub>8</sub> | S <sub>8</sub> |
| B-1440 | S <sub>8</sub> | S <sub>4</sub> | S <sub>2</sub> | S <sub>1</sub> | S <sub>4</sub> | S <sub>4</sub> | S <sub>1</sub> | S <sub>1</sub> | S <sub>8</sub> | S <sub>8</sub> | S <sub>8</sub> |
| B-1441 | S <sub>8</sub> | S <sub>4</sub> | S <sub>2</sub> | S <sub>1</sub> | S <sub>4</sub> | S <sub>4</sub> | S <sub>1</sub> | S <sub>1</sub> | S <sub>8</sub> | S <sub>8</sub> | S <sub>8</sub> |
| B-1442 | S <sub>8</sub> | S <sub>4</sub> | S <sub>2</sub> | S <sub>1</sub> | S <sub>4</sub> | S <sub>4</sub> | S <sub>1</sub> | S <sub>1</sub> | S <sub>8</sub> | S <sub>8</sub> | S <sub>8</sub> |
| B-1443 | S <sub>8</sub> | S <sub>4</sub> | S <sub>2</sub> | S <sub>1</sub> | S <sub>4</sub> | S <sub>4</sub> | S <sub>1</sub> | S <sub>1</sub> | S <sub>8</sub> | S <sub>8</sub> | S <sub>8</sub> |
| B-1444 | S <sub>8</sub> | S <sub>4</sub> | S <sub>2</sub> | S <sub>1</sub> | S <sub>4</sub> | S <sub>4</sub> | S <sub>1</sub> | S <sub>1</sub> | S <sub>8</sub> | S <sub>8</sub> | S <sub>8</sub> |
| B-1445 | S <sub>8</sub> | S <sub>4</sub> | S <sub>2</sub> | S <sub>1</sub> | S <sub>4</sub> | S <sub>4</sub> | S <sub>1</sub> | S <sub>1</sub> | S <sub>8</sub> | S <sub>8</sub> | S <sub>8</sub> |
| B-1446 | S <sub>8</sub> | S <sub>4</sub> | S <sub>2</sub> | S <sub>1</sub> | S <sub>4</sub> | S <sub>4</sub> | S <sub>1</sub> | S <sub>1</sub> | S <sub>8</sub> | S <sub>8</sub> | S <sub>8</sub> |
| B-1447 | S <sub>8</sub> | S <sub>4</sub> | S <sub>2</sub> | S <sub>1</sub> | S <sub>4</sub> | S <sub>4</sub> | S <sub>1</sub> | S <sub>1</sub> | S <sub>8</sub> | S <sub>8</sub> | S <sub>8</sub> |
| B-1448 | S <sub>8</sub> | S <sub>4</sub> | S <sub>2</sub> | S <sub>1</sub> | S <sub>4</sub> | S <sub>4</sub> | S <sub>1</sub> | S <sub>1</sub> | S <sub>8</sub> | S <sub>8</sub> | S <sub>8</sub> |
| B-1449 | S <sub>8</sub> | S <sub>4</sub> | S <sub>2</sub> | S <sub>1</sub> | S <sub>4</sub> | S <sub>4</sub> | S <sub>1</sub> | S <sub>1</sub> | S <sub>8</sub> | S <sub>8</sub> | S <sub>8</sub> |
| B-1450 | S <sub>8</sub> | S <sub>4</sub> | S <sub>2</sub> | S <sub>1</sub> | S <sub>4</sub> | S <sub>4</sub> | S <sub>1</sub> | S <sub>1</sub> | S <sub>8</sub> | S <sub>8</sub> | S <sub>8</sub> |
| B-1451 | S <sub>8</sub> | S <sub>4</sub> | S <sub>2</sub> | S <sub>1</sub> | S <sub>4</sub> | S <sub>4</sub> | S <sub>1</sub> | S <sub>1</sub> | S <sub>8</sub> | S <sub>8</sub> | S <sub>8</sub> |
| B-1452 | S <sub>8</sub> | S <sub>4</sub> | S <sub>2</sub> | S <sub>1</sub> | S <sub>4</sub> | S <sub>4</sub> | S <sub>1</sub> | S <sub>1</sub> | S <sub>8</sub> | S <sub>8</sub> | S <sub>8</sub> |
| B-1453 | S <sub>8</sub> | S <sub>4</sub> | S <sub>2</sub> | S <sub>1</sub> | S <sub>4</sub> | S <sub>4</sub> | S <sub>1</sub> | S <sub>1</sub> | S <sub>8</sub> | S <sub>8</sub> | S <sub>8</sub> |
| B-1454 | S <sub>8</sub> | S <sub>4</sub> | S <sub>2</sub> | S <sub>1</sub> | S <sub>4</sub> | S <sub>4</sub> | S <sub>1</sub> | S <sub>1</sub> | S <sub>8</sub> | S <sub>8</sub> | S <sub>8</sub> |
| B-1455 | S <sub>8</sub> | S <sub>4</sub> | S <sub>2</sub> | S <sub>1</sub> | S <sub>4</sub> | S <sub>4</sub> | S <sub>1</sub> | S <sub>1</sub> | S <sub>8</sub> | S <sub>8</sub> | S <sub>8</sub> |
| B-1456 | S <sub>8</sub> | S <sub>4</sub> | S <sub>2</sub> | S <sub>1</sub> | S <sub>4</sub> | S <sub>4</sub> | S <sub>1</sub> | S <sub>1</sub> | S <sub>8</sub> | S <sub>8</sub> | S <sub>8</sub> |
| B-1457 | S <sub>8</sub> | S <sub>4</sub> | S <sub>2</sub> | S <sub>1</sub> | S <sub>4</sub> | S <sub>4</sub> | S <sub>1</sub> | S <sub>1</sub> | S <sub>8</sub> | S <sub>8</sub> | S <sub>8</sub> |
| B-1458 | S <sub>8</sub> | S <sub>4</sub> | S <sub>2</sub> | S <sub>1</sub> | S <sub>4</sub> | S <sub>4</sub> | S <sub>1</sub> | S <sub>1</sub> | S <sub>8</sub> | S <sub>8</sub> | S <sub>8</sub> |
| B-1459 | S <sub>8</sub> | S <sub>4</sub> | S <sub>2</sub> | S <sub>1</sub> | S <sub>4</sub> | S <sub>4</sub> | S <sub>1</sub> | S <sub>1</sub> | S <sub>8</sub> | S <sub>8</sub> | S <sub>8</sub> |
| B-1460 | S <sub>8</sub> | S <sub>4</sub> | S <sub>2</sub> | S <sub>1</sub> | S <sub>4</sub> | S <sub>4</sub> | S <sub>1</sub> | S <sub>1</sub> | S <sub>8</sub> | S <sub>8</sub> | S <sub>8</sub> |
| B-1461 | S <sub>8</sub> | S <sub>4</sub> | S <sub>2</sub> | S <sub>1</sub> | S <sub>4</sub> | S <sub>4</sub> | S <sub>1</sub> | S <sub>1</sub> | S <sub>8</sub> | S <sub>8</sub> | S <sub>8</sub> |
| B-1462 | S <sub>8</sub> | S <sub>4</sub> | S <sub>2</sub> | S <sub>1</sub> | S <sub>4</sub> | S <sub>4</sub> | S <sub>1</sub> | S <sub>1</sub> | S <sub>8</sub> | S <sub>8</sub> | S <sub>8</sub> |
| B-1463 | S <sub>8</sub> | S <sub>4</sub> | S <sub>2</sub> | S <sub>1</sub> | S <sub>4</sub> | S <sub>4</sub> | S <sub>1</sub> | S <sub>1</sub> | S <sub>8</sub> | S <sub>8</sub> | S <sub>8</sub> |
| B-1464 | S <sub>8</sub> | S <sub>4</sub> | S <sub>2</sub> | S <sub>1</sub> | S <sub>4</sub> | S <sub>4</sub> | S <sub>1</sub> | S <sub>1</sub> | S <sub>8</sub> | S <sub>8</sub> | S <sub>8</sub> |
| B-1465 | S <sub>8</sub> | S <sub>4</sub> | S <sub>2</sub> | S <sub>1</sub> | S <sub>4</sub> | S <sub>4</sub> | S <sub>1</sub> | S <sub>1</sub> | S <sub>8</sub> | S <sub>8</sub> | S <sub>8</sub> |
| B-1466 | S <sub>8</sub> | S <sub>4</sub> | S <sub>2</sub> | S <sub>1</sub> | S <sub>4</sub> | S <sub>4</sub> | S <sub>1</sub> | S <sub>1</sub> | S <sub>8</sub> | S <sub>8</sub> | S <sub>8</sub> |
| B-1467 | S <sub>8</sub> | S <sub>4</sub> | S <sub>2</sub> | S <sub>1</sub> | S <sub>4</sub> | S <sub>4</sub> | S <sub>1</sub> | S <sub>1</sub> | S <sub>8</sub> | S <sub>8</sub> | S <sub>8</sub> |
| B-1468 | S <sub>8</sub> | S <sub>4</sub> | S <sub>2</sub> | S <sub>1</sub> | S <sub>4</sub> | S <sub>4</sub> | S <sub>1</sub> | S <sub>1</sub> | S <sub>8</sub> | S <sub>8</sub> | S <sub>8</sub> |
| B-1469 | S <sub>8</sub> | S <sub>4</sub> | S <sub>2</sub> | S <sub>1</sub> | S <sub>4</sub> | S <sub>4</sub> | S <sub>1</sub> | S <sub>1</sub> | S <sub>8</sub> | S <sub>8</sub> | S <sub>8</sub> |
| B-1471 | S <sub>8</sub> | S <sub>4</sub> | S <sub>2</sub> | S <sub>1</sub> | S <sub>4</sub> | S <sub>4</sub> | S <sub>1</sub> | S <sub>1</sub> | S <sub>8</sub> | S <sub>8</sub> | S <sub>8</sub> |
| B-1472 | S <sub>8</sub> | S <sub>4</sub> | S <sub>2</sub> | S <sub>1</sub> | S <sub>4</sub> | S <sub>4</sub> | S <sub>1</sub> | S <sub>1</sub> | S <sub>8</sub> | S <sub>8</sub> | S <sub>8</sub> |
| B-1473 | S <sub>8</sub> | S <sub>4</sub> | S <sub>2</sub> | S <sub>1</sub> | S <sub>4</sub> | S <sub>4</sub> | S <sub>1</sub> | S <sub>1</sub> | S <sub>8</sub> | S <sub>8</sub> | S <sub>8</sub> |
| B-1474 | S <sub>8</sub> | S <sub>4</sub> | S <sub>2</sub> | S <sub>1</sub> | S <sub>4</sub> | S <sub>4</sub> | S <sub>1</sub> | S <sub>1</sub> | S <sub>8</sub> | S <sub>8</sub> | S <sub>8</sub> |
| B-1475 | S <sub>8</sub> | S <sub>4</sub> | S <sub>2</sub> | S <sub>1</sub> | S <sub>4</sub> | S <sub>4</sub> | S <sub>1</sub> | S <sub>1</sub> | S <sub>8</sub> | S <sub>8</sub> | S <sub>8</sub> |
| B-1476 | S <sub>8</sub> | S <sub>4</sub> | S <sub>2</sub> | S <sub>1</sub> | S <sub>4</sub> | S <sub>4</sub> | S <sub>1</sub> | S <sub>1</sub> | S <sub>8</sub> | S <sub>8</sub> | S <sub>8</sub> |
| B-1477 | S <sub>8</sub> | S <sub>4</sub> | S <sub>2</sub> | S <sub>1</sub> | S <sub>4</sub> | S <sub>4</sub> | S <sub>1</sub> | S <sub>1</sub> | S <sub>8</sub> | S <sub>8</sub> | S <sub>8</sub> |
| B-1478 | S <sub>8</sub> | S <sub>4</sub> | S <sub>2</sub> | S <sub>1</sub> | S <sub>4</sub> | S <sub>4</sub> | S <sub>1</sub> | S <sub>1</sub> | S <sub>8</sub> | S <sub>8</sub> | S <sub>8</sub> |
| B-1479 | S <sub>8</sub> | S <sub>4</sub> | S <sub>2</sub> | S <sub>1</sub> | S <sub>4</sub> | S <sub>4</sub> | S <sub>1</sub> | S <sub>1</sub> | S <sub>8</sub> | S <sub>8</sub> | S <sub>8</sub> |
| B-1480 | S <sub>8</sub> | S <sub>4</sub> | S <sub>2</sub> | S <sub>1</sub> | S <sub>4</sub> | S <sub>4</sub> | S <sub>1</sub> | S <sub>1</sub> | S <sub>8</sub> | S <sub>8</sub> | S <sub>8</sub> |
| B-1481 | S <sub>8</sub> | S <sub>4</sub> | S <sub>2</sub> | S <sub>1</sub> | S <sub>4</sub> | S <sub>4</sub> | S <sub>1</sub> | S <sub>1</sub> | S <sub>8</sub> | S <sub>8</sub> | S <sub>8</sub> |
| B-1482 | S <sub>8</sub> | S <sub>4</sub> | S <sub>2</sub> | S <sub>1</sub> | S <sub>4</sub> | S <sub>4</sub> | S <sub>1</sub> | S <sub>1</sub> | S <sub>8</sub> | S <sub>8</sub> | S <sub>8</sub> |
| B-1483 | S <sub>8</sub> | S <sub>4</sub> | S <sub>2</sub> | S <sub>1</sub> | S <sub>4</sub> | S <sub>4</sub> | S <sub>1</sub> | S <sub>1</sub> | S <sub>8</sub> | S <sub>8</sub> | S <sub>8</sub> |
| B-1484 | S <sub>8</sub> | S <sub>4</sub> | S <sub>2</sub> | S <sub>1</sub> | S <sub>4</sub> | S <sub>4</sub> | S <sub>1</sub> | S <sub>1</sub> | S <sub>8</sub> | S <sub>8</sub> | S <sub>8</sub> |
| B-1485 | S <sub>8</sub> | S <sub>4</sub> | S <sub>2</sub> | S <sub>1</sub> | S <sub>4</sub> | S <sub>4</sub> | S <sub>1</sub> | S <sub>1</sub> | S <sub>8</sub> | S <sub>8</sub> | S <sub>8</sub> |
| B-1486 | S <sub>8</sub> | S <sub>4</sub> | S <sub>2</sub> | S <sub>1</sub> | S <sub>4</sub> | S <sub>4</sub> | S <sub>1</sub> | S <sub>1</sub> | S <sub>8</sub> | S <sub>8</sub> | S <sub>8</sub> |
| B-1487 | S <sub>8</sub> | S <sub>4</sub> | S <sub>2</sub> | S <sub>1</sub> | S <sub>4</sub> | S <sub>4</sub> | S <sub>1</sub> | S <sub>1</sub> | S <sub>8</sub> | S <sub>8</sub> | S <sub>8</sub> |
| B-1488 | S <sub>8</sub> | S <sub>4</sub> | S <sub>2</sub> | S <sub>1</sub> | S <sub>4</sub> | S <sub>4</sub> | S <sub>1</sub> | S <sub>1</sub> | S <sub>8</sub> | S <sub>8</sub> | S <sub>8</sub> |
| B-1489 | S <sub>8</sub> | S <sub>4</sub> | S <sub>2</sub> | S <sub>1</sub> | S <sub>4</sub> | S <sub>4</sub> | S <sub>1</sub> | S <sub>1</sub> | S <sub>8</sub> | S <sub>8</sub> | S <sub>8</sub> |
| B-1490 | S <sub>8</sub> | S <sub>4</sub> | S <sub>2</sub> | S <sub>1</sub> | S <sub>4</sub> | S <sub>4</sub> | S <sub>1</sub> | S <sub>1</sub> | S <sub>8</sub> | S <sub>8</sub> | S <sub>8</sub> |
| B-1491 | S <sub>8</sub> | S <sub>4</sub> | S <sub>2</sub> | S <sub>1</sub> | S <sub>4</sub> | S <sub>4</sub> | S <sub>1</sub> | S <sub>1</sub> | S <sub>8</sub> | S <sub>8</sub> | S <sub>8</sub> |
| B-1492 | S <sub>8</sub> | S <sub>4</sub> | S <sub>2</sub> | S <sub>1</sub> | S <sub>4</sub> | S <sub>4</sub> | S <sub>1</sub> | S <sub>1</sub> | S <sub>8</sub> | S <sub>8</sub> | S <sub>8</sub> |
| B-1493 | S <sub>8</sub> | S<             |                |                |                |                |                |                |                |                |                |
